# Supplementary material
Source: publisher figshare collection journal article supplement (https://acs.figshare.com/ndownloader/files/24597577)
Supplement: Supplementary file 1 [file 24597577]

## Supporting Information

Heart valves cross-linked with erythrocyte membrane drug-loaded nanoparticles as a biomimetic strategy for anti-coagulation, anti-inflammation, anti-calcification, and endothelialization

*Cheng Hu, † Rifang Luo, † Yunbing Wang\*†*

† National Engineering Research Center for Biomaterials, Sichuan University, Chengdu 610064, China

### Corresponding Authors

\*E-mail: yunbing.wang@scu.edu.cn. Tel.: 86-28-85410280 (Y.W.).

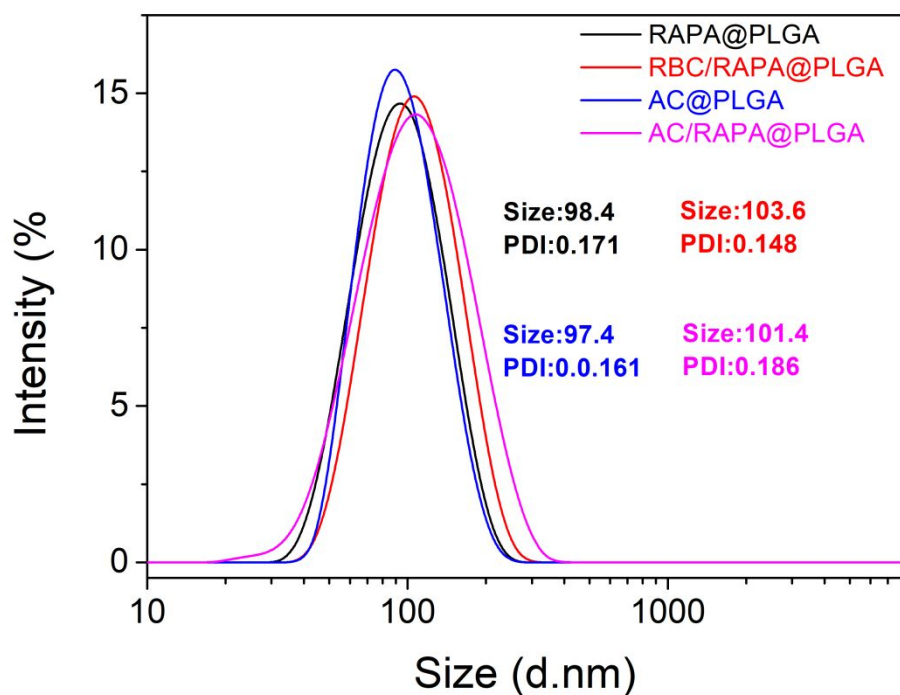

**Figure S1.** Particle size distribution of RAPA@PLGA, RBC/RAPA@PLGA, AC@PLGA and RBC/AC@PLGA in H<sub>2</sub>O measured by DLS.

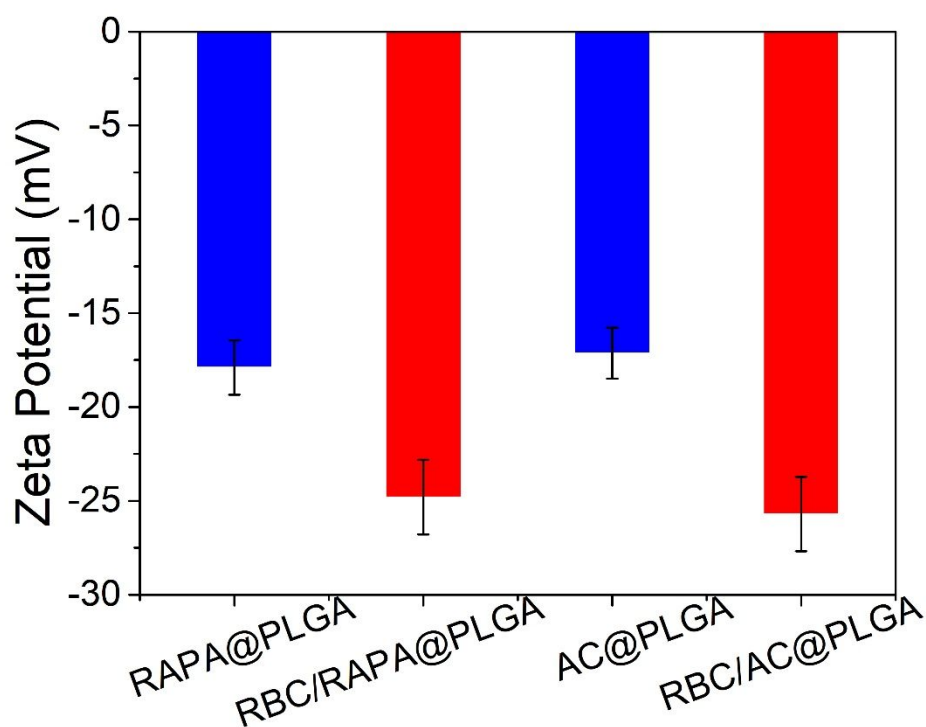

**Figure S2.** Zeta potential of RAPA@PLGA, RBC/RAPA@PLGA, AC@PLGA and RBC/AC@PLGA in H<sub>2</sub>O (n=3).

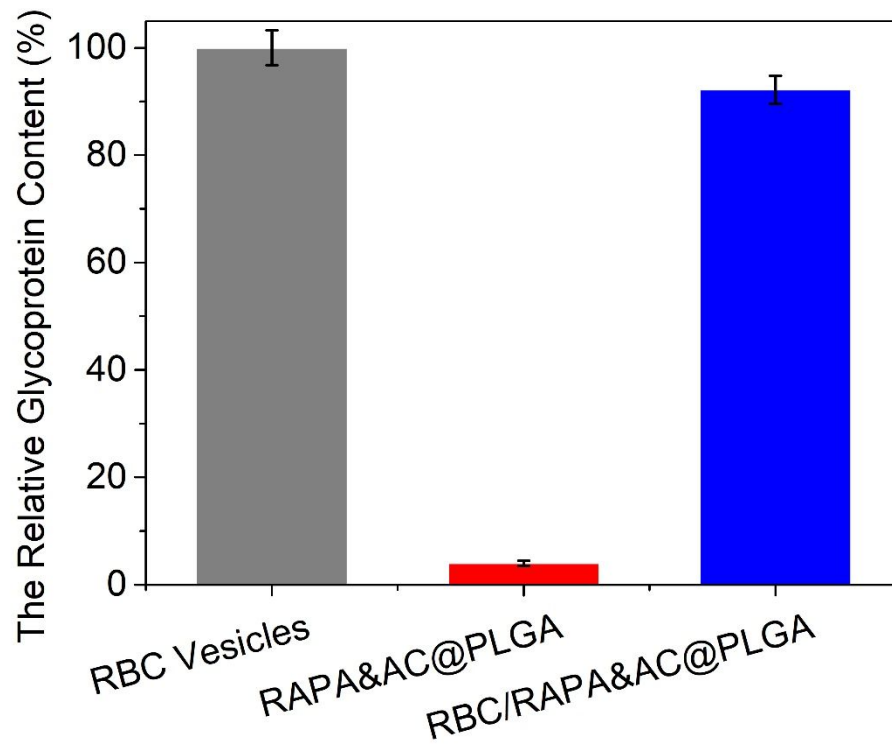

**Figure S3.** The relative glycoprotein content of the RBC vesicles, RAPA&AC@PLGA and RBC/RAPA&AC@PLGA (n = 5).

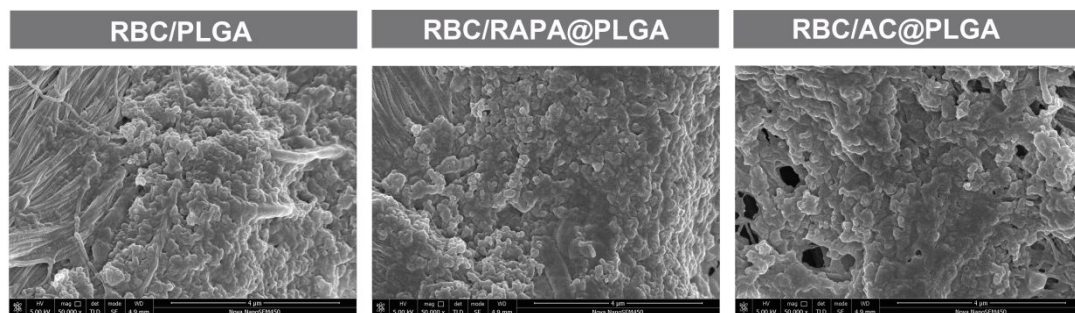

**Figure S4.** The SEM images of heart valves treated with RBC/PLGA, RBC/RAPA@PLGA and RBC/AC@PLGA (scale bar = 4  $\mu$ m).

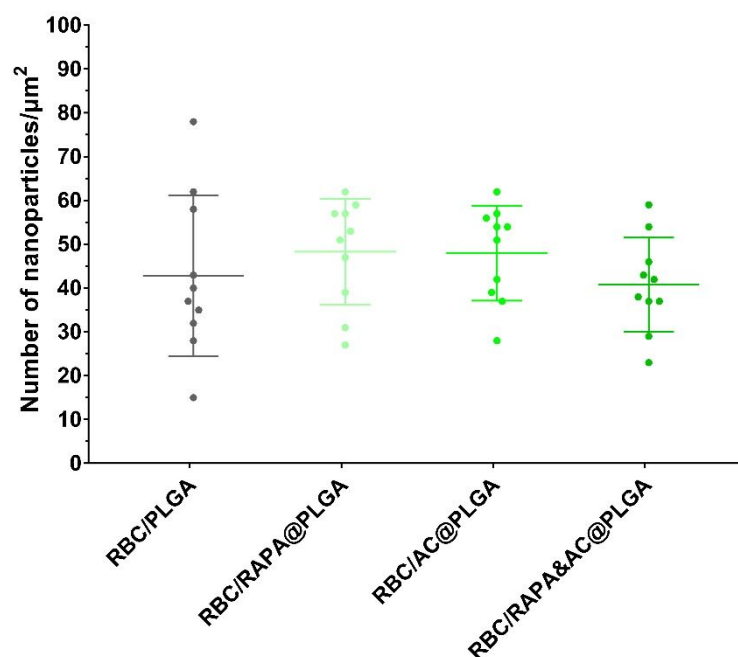

**Figure S5.** Number of nanoparticles on the surface of differently treated heart valve samples.

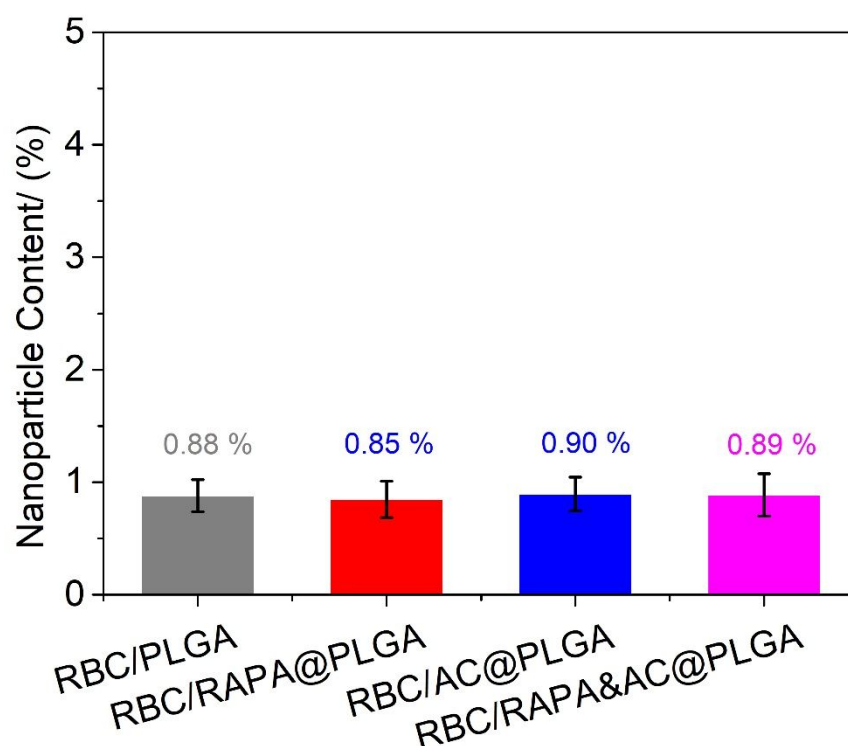

**Figure S6.** Nanoparticle content of different heart valve samples after the cross-linked nanoparticles was calculated (n = 5).

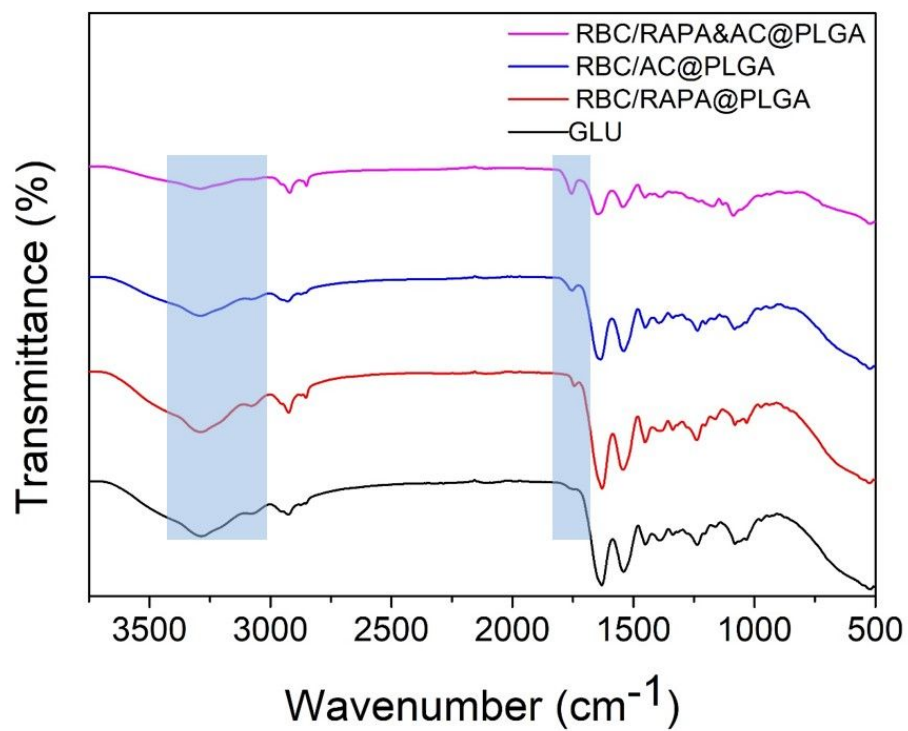

**Figure S7.** ATR-FTIR spectra of GLU (black), RBC/RAPA@PLGA (red), RBC/AC@PLGA (blue), and RBC/RAPA&AC@PLGA (purple) were shown.

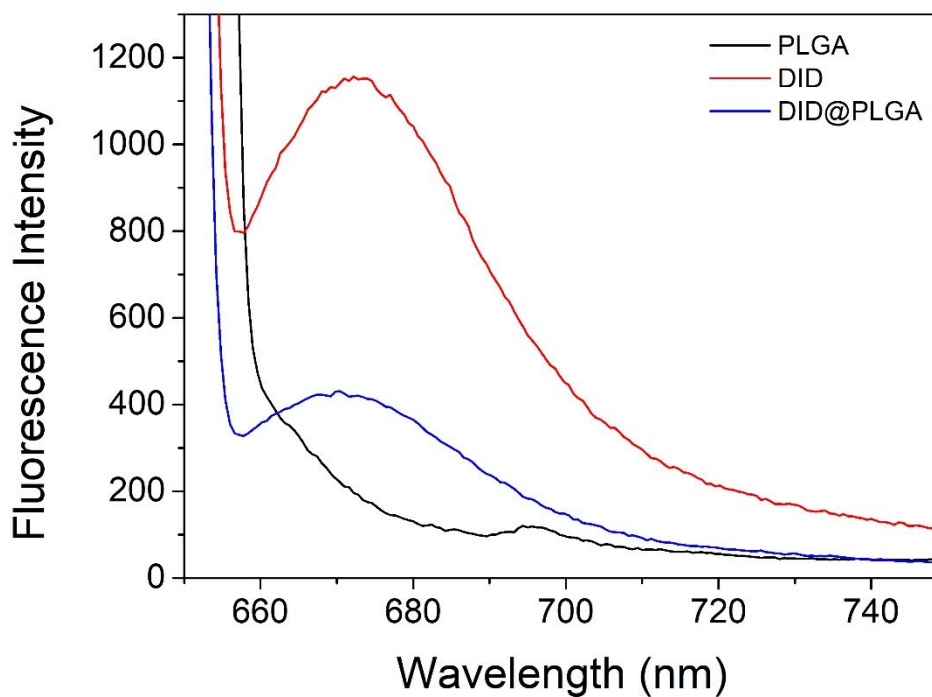

**Figure S8.** The fluorescence intensity of PLGA, DID, and DID@PLGA in H<sub>2</sub>O.

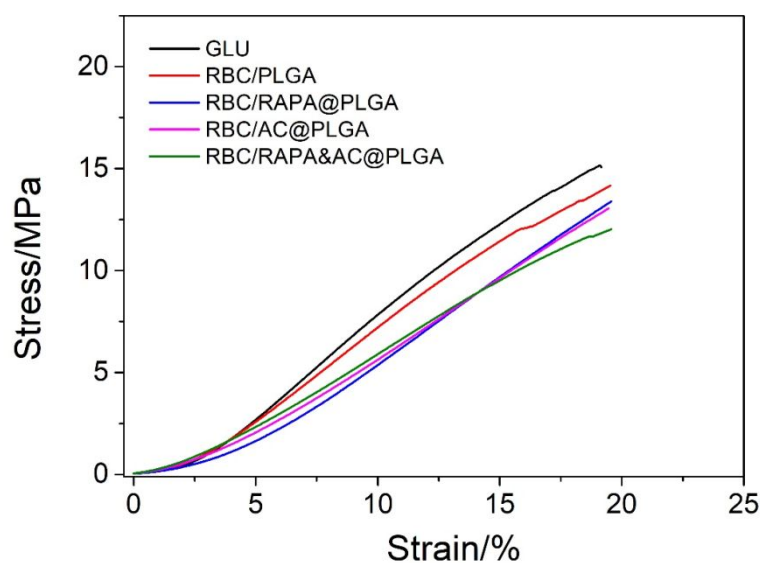

**Figure S9.** Representative stress-strain curves of heart valves before and after modification.

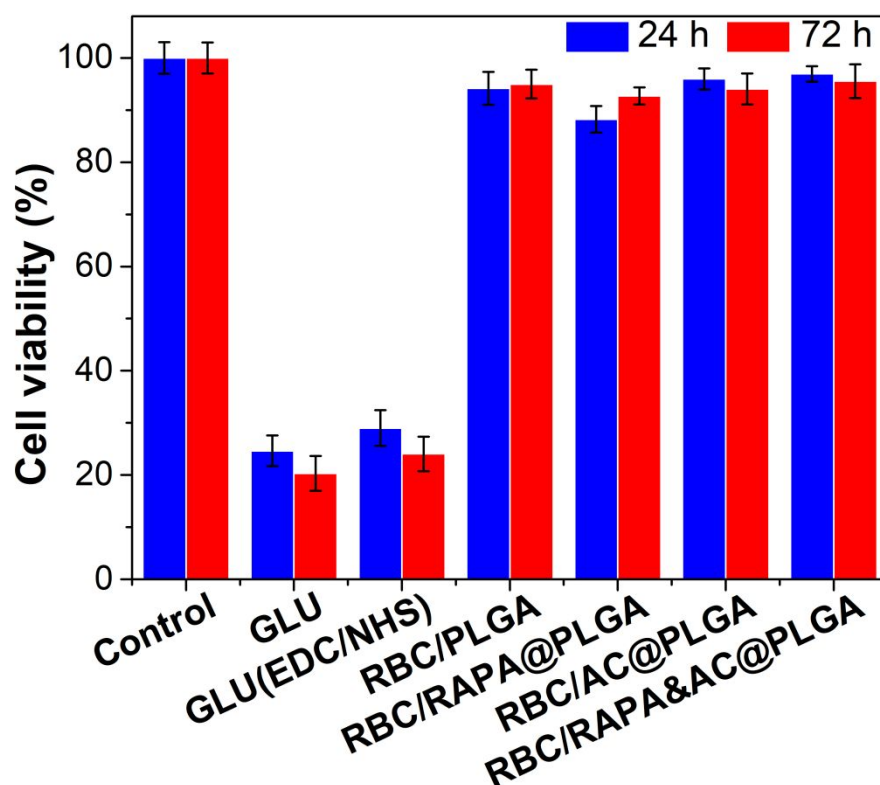

**Figure S10.** Cytotoxicity of different valve samples. Cell viability of L929 cells was determined by CCK-8 assay ( $n = 6$ ) after culturing with the extracts of different valve samples for 24 h and 72 h. The GLU(EDC/NHS) group represents that the GLU-treated valves were treated by EDC/NHS only.

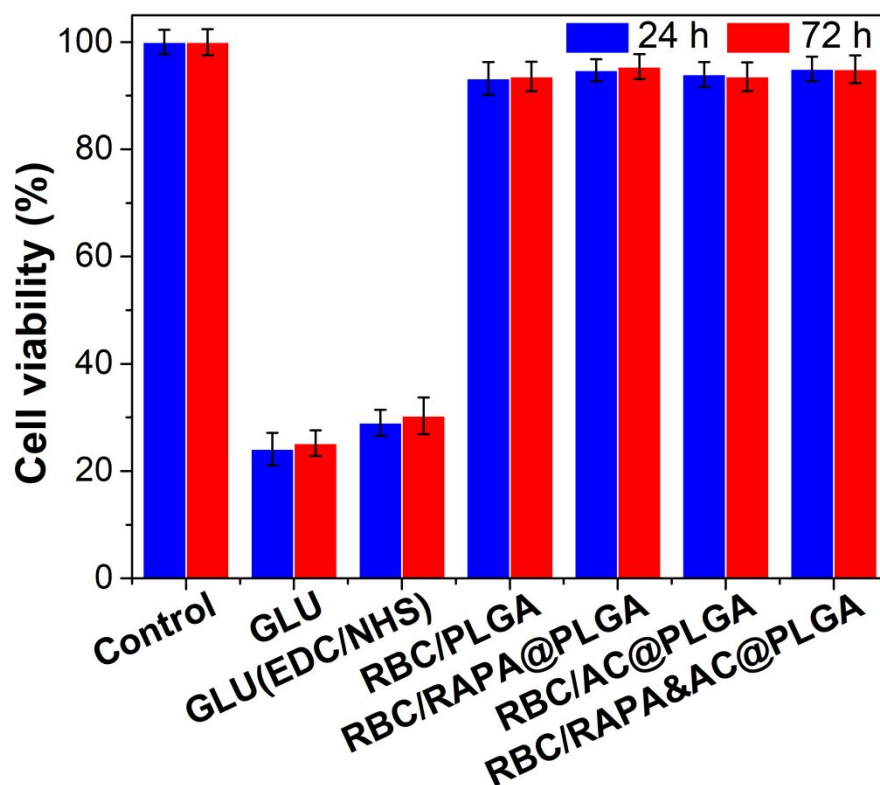

**Figure S11.** Cytotoxicity of different valve samples. Cell viability of HUVECs was determined by CCK-8 assay ( $n = 6$ ) after culturing with the extracts of different valve samples for 24 h and 72 h. The GLU(EDC/NHS) group represents that the GLU-treated valves were treated by EDC/NHS only.

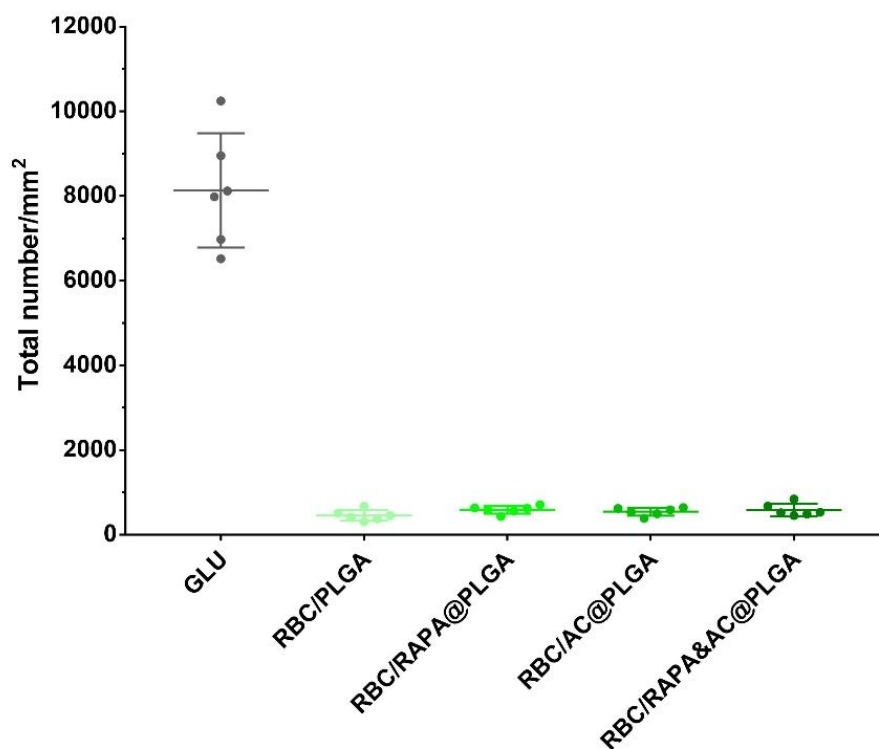

**Figure S12.** Total number of red blood cells and platelets adhered on the surface of differently treated heart valve samples.

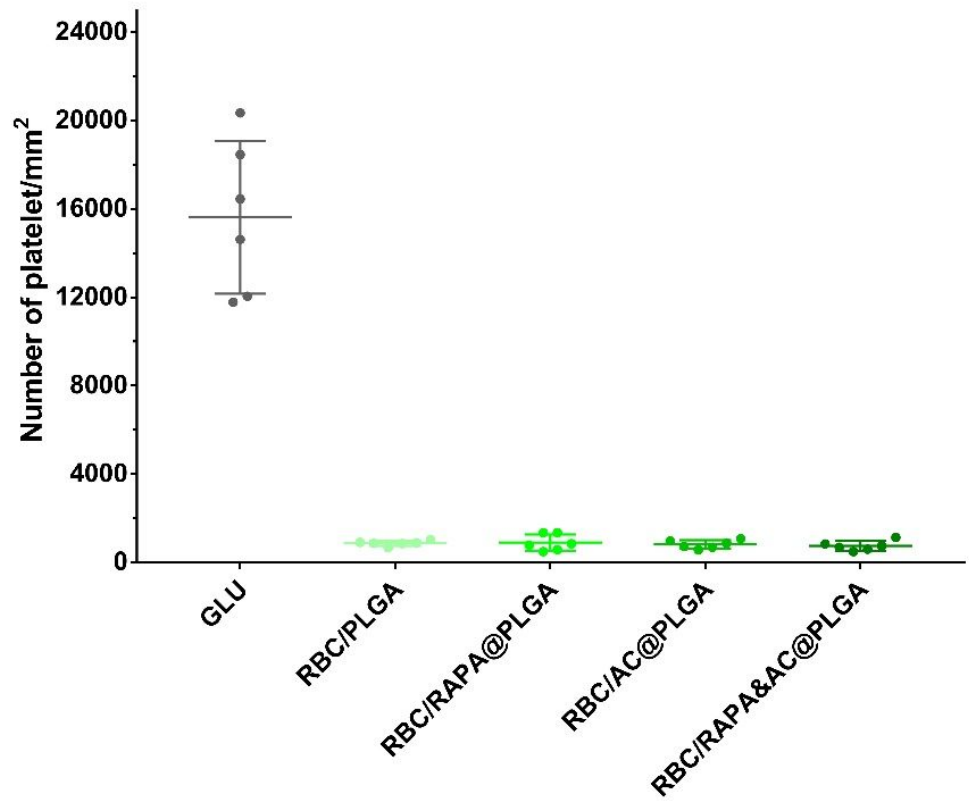

**Figure S13.** Number of platelets adhered on the surface of differently treated heart valve samples.

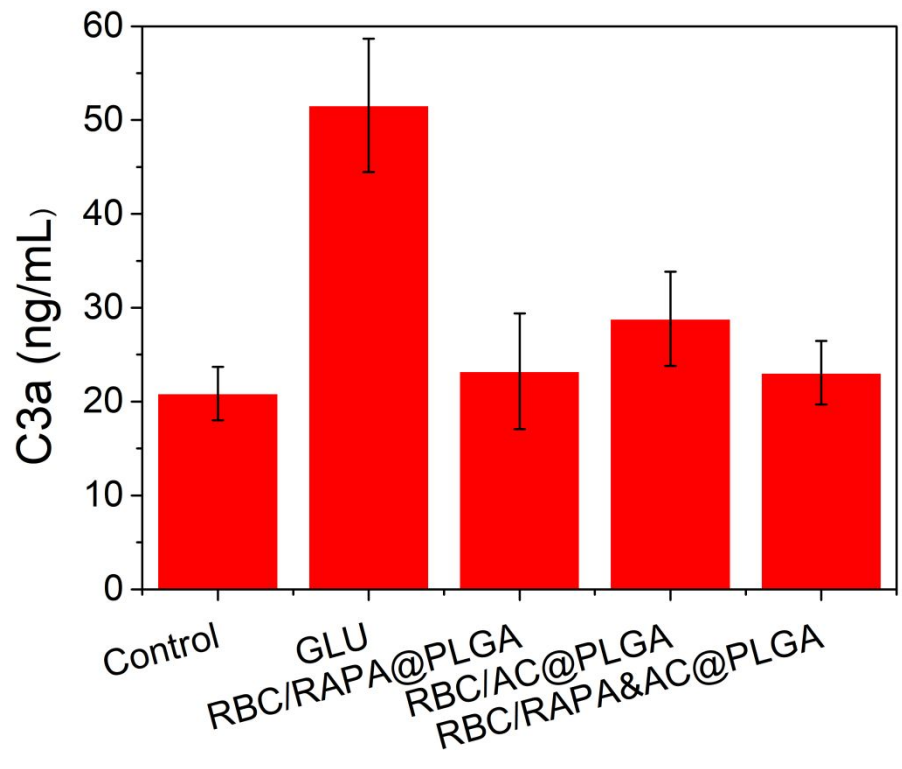



**Figure S14.** The concentrations of C3a in the plasma after treated with different heart valve samples ( $n = 5$ ).

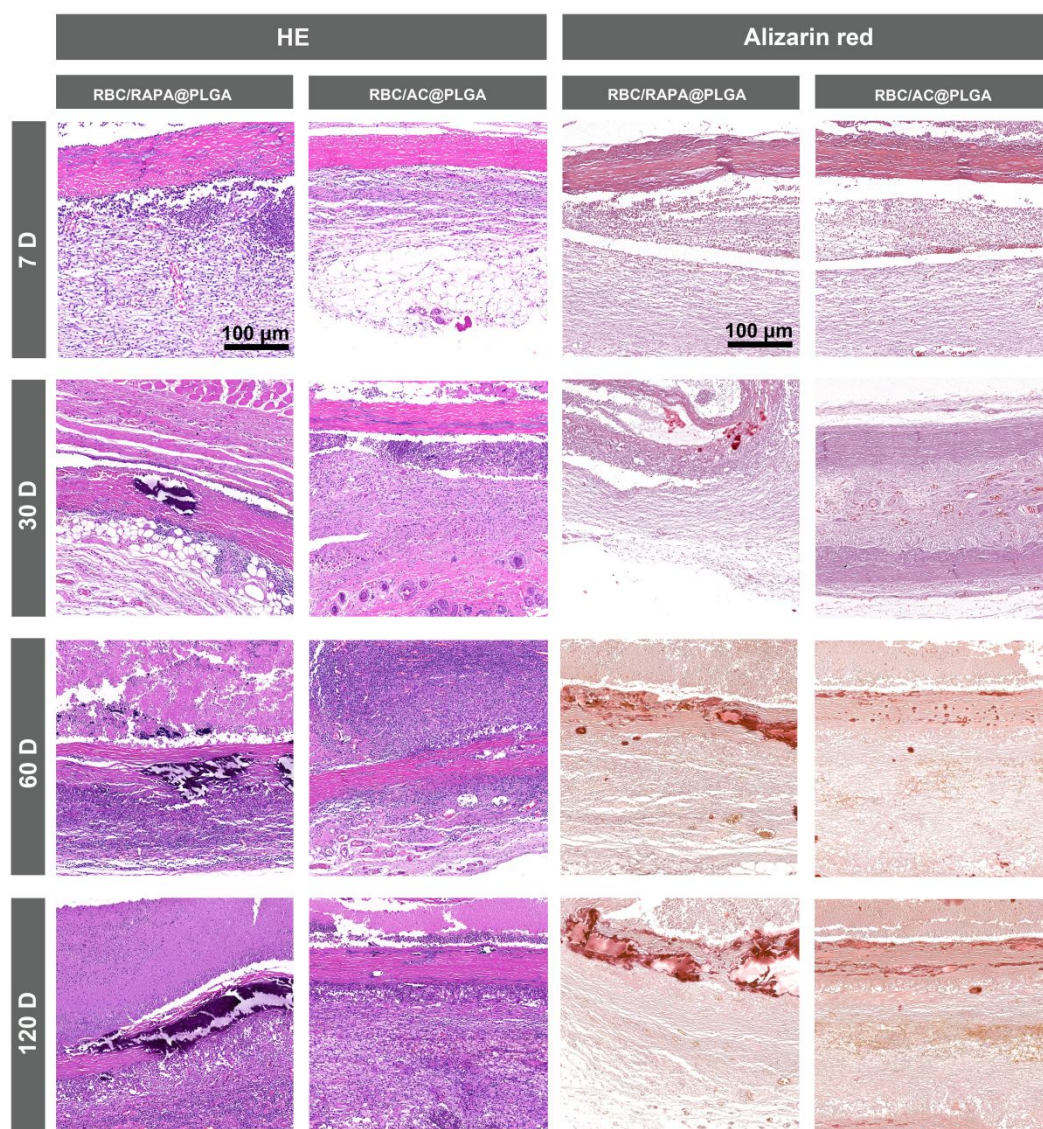

**Figure S15.** HE and alizarin red staining of different heart valve samples at 7, 30, 60, and 120 days postimplantation into male rats. The scale bars are 100  $\mu$ m.

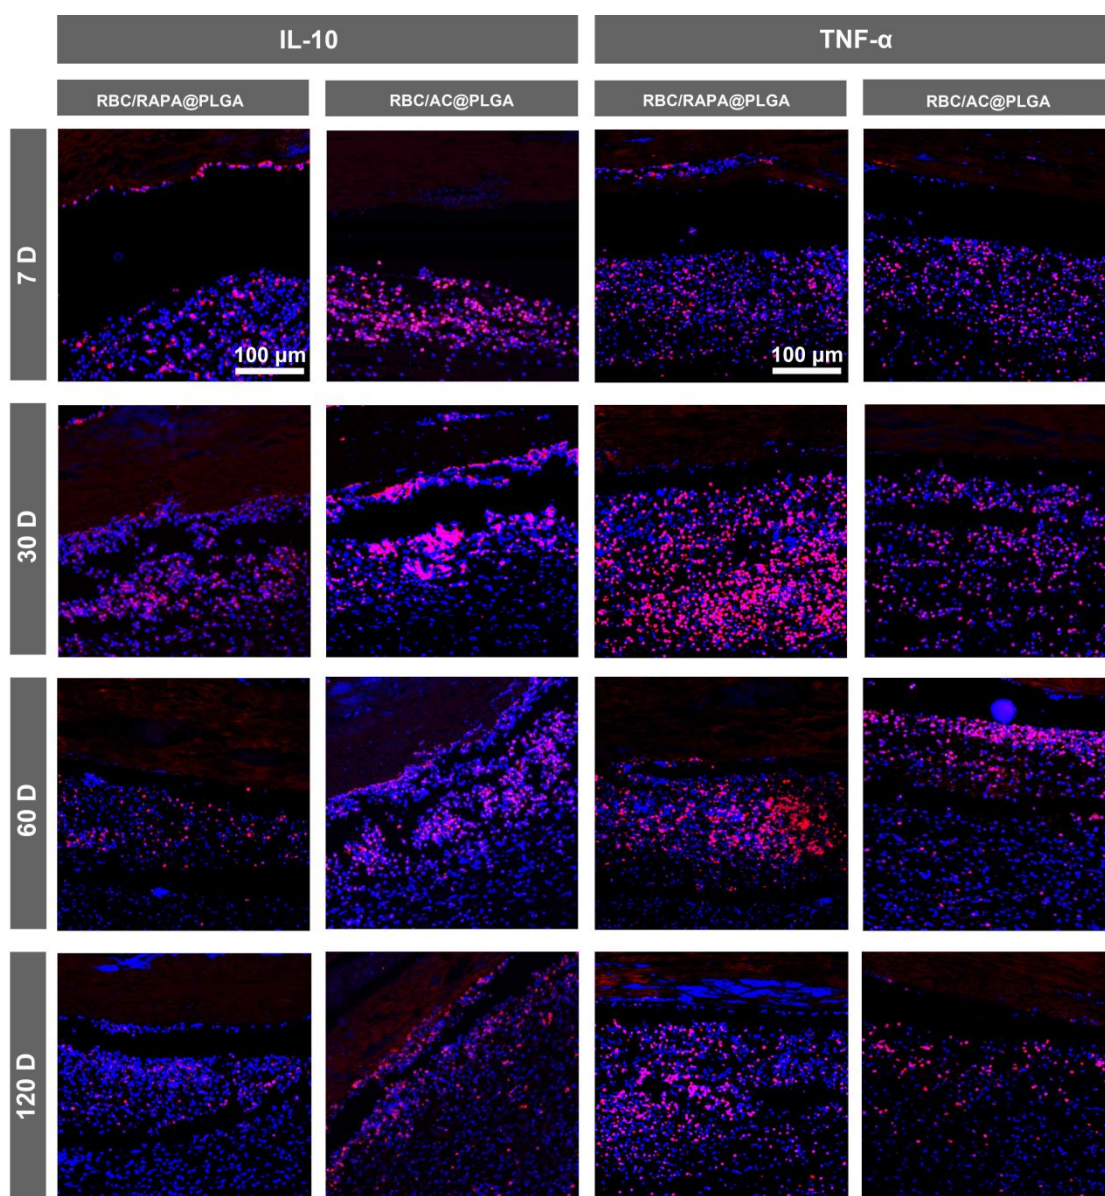

**Figure S16.** IL-10 and TNF- $\alpha$  of different heart valve samples at 7, 30, 60, and 120 days postimplantation into male SD rats. The scale bars are 100  $\mu$ m.
